# Supplementary material for: Variable-valence ion and heterointerface accelerated electron transfer kinetics of electrochemical water splitting
Source: Royal Society of Chemistry journal article supplement (doi:10.1039/d1ta11011j), 2022-01-01
Supplement: d1ta11011j1.pdf [file d1ta11011j1.pdf]

Electronic supplementary information

## **Variable-valence ion and heterointerface accelerated electron transfer kinetics of electrochemical water splitting**

Mengfei Lu<sup>a,b</sup>, Shaoxi Kong<sup>b</sup>, Shicheng Yan<sup>b,\*</sup>, Peng Zhou<sup>b,\*</sup>, Tao Yu<sup>a,\*</sup>, Zhigang Zou<sup>a,b</sup>

<sup>a</sup> Jiangsu Key Laboratory for Nano Technology, National Laboratory of Solid State Microstructures, School of Physics, Nanjing University, Nanjing, Jiangsu 210093, P. R. China.

<sup>b</sup> Jiangsu Key Laboratory of Artificial Functional Materials, Eco-materials and Renewable Energy Research Center (ERERC), Collaborative Innovation Center of Advanced Microstructures, College of Engineering and Applied Sciences, Nanjing University, Nanjing, Jiangsu 210093, P. R. China.

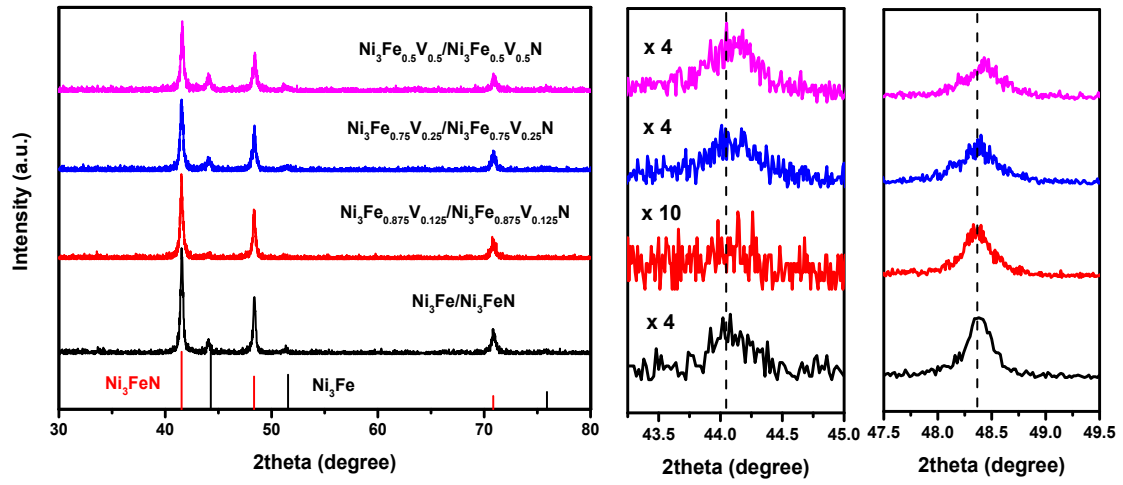

**Fig. S1** XRD patterns of  $\text{Ni}_3\text{Fe}_{1-x}\text{V}_x/\text{Ni}_3\text{Fe}_{1-x}\text{V}_x\text{N}$  ( $x = 0, 0.125, 0.25, 0.5$ ) heterojunctions and enlarged regions at the  $2\theta$  of 43.25-45 and 47.5-49.5 degrees.

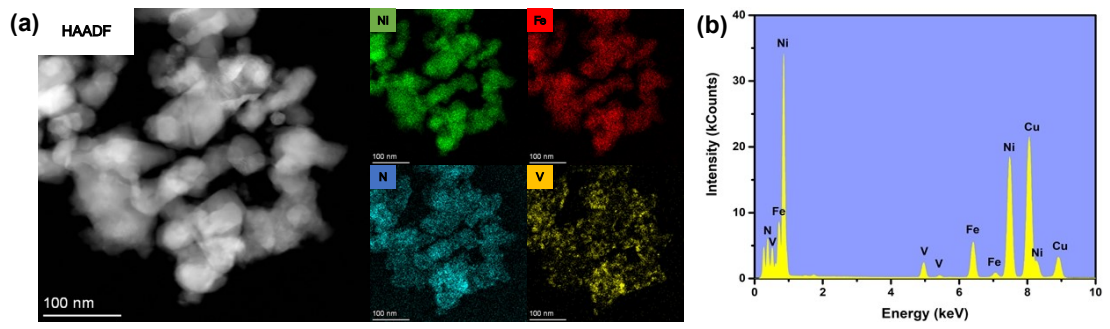

**Fig. S2** (a) HAADF-STEM and (b) EDS elemental mapping images of  $\text{Ni}_3\text{Fe}_{0.75}\text{V}_{0.25}/\text{Ni}_3\text{Fe}_{0.75}\text{V}_{0.25}\text{N}$ .

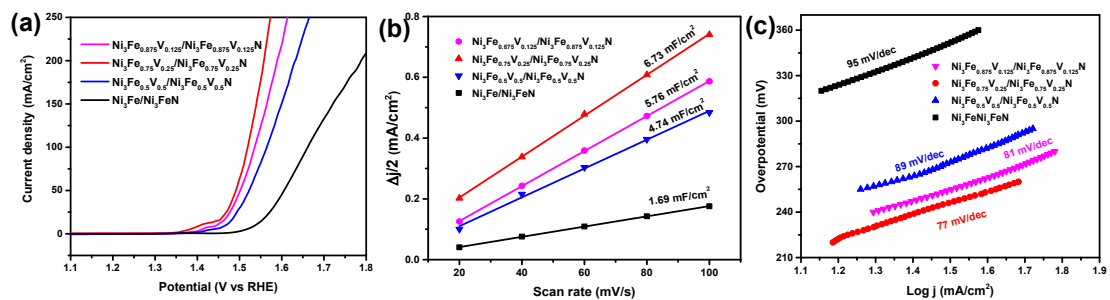

**Fig. S3** The OER performances of Ni<sub>3</sub>Fe<sub>1-x</sub>V<sub>x</sub>/Ni<sub>3</sub>Fe<sub>1-x</sub>V<sub>x</sub>N ( $x = 0, 0.125, 0.25, 0.5$ ). (a) OER polarization curves with 90 % iR correction at a scan rate of 10 mV/s in 1.0 M KOH. (b) Plots of capacitive current density versus scan rate. The slopes ( $C_{dl}$ ) represent ECSAs. (c) Tafel plots derived from the LSV data.

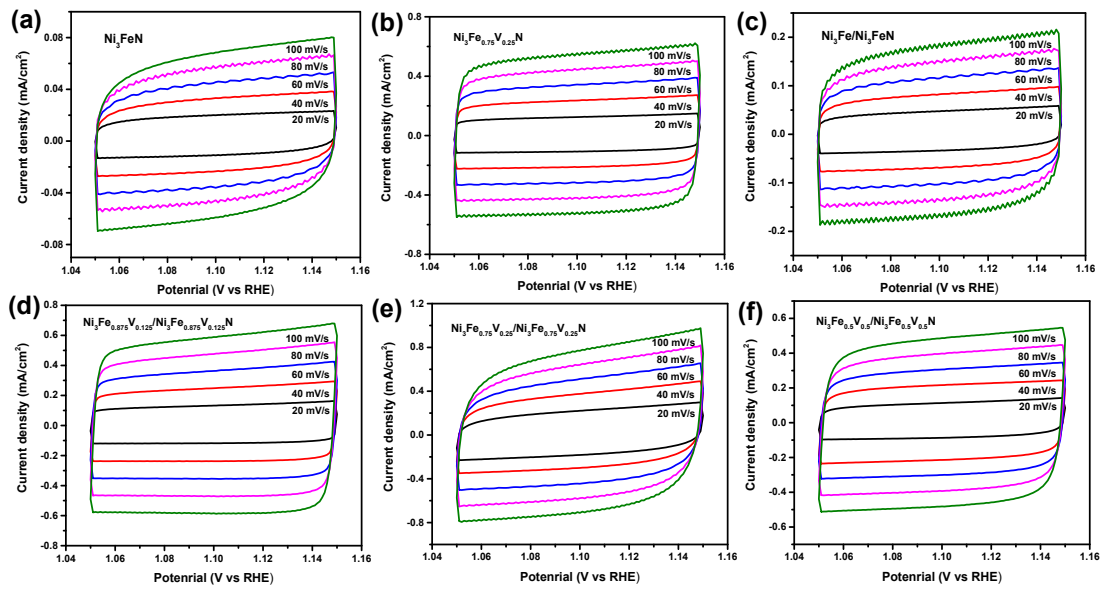

**Fig. S4** Cyclic voltammety curves of (a)  $\text{Ni}_3\text{FeN}$ , (b)  $\text{Ni}_3\text{Fe}_{0.75}\text{V}_{0.25}\text{N}$ , (c)  $\text{Ni}_3\text{Fe}/\text{Ni}_3\text{FeN}$ , (d)  $\text{Ni}_3\text{Fe}_{0.875}\text{V}_{0.125}/\text{Ni}_3\text{Fe}_{0.875}\text{V}_{0.125}\text{N}$ , (e)  $\text{Ni}_3\text{Fe}_{0.75}\text{V}_{0.25}/\text{Ni}_3\text{Fe}_{0.75}\text{V}_{0.25}\text{N}$ , and (f)  $\text{Ni}_3\text{Fe}_{0.5}\text{V}_{0.5}/\text{Ni}_3\text{Fe}_{0.5}\text{V}_{0.5}\text{N}$  at various scan rates (20, 40, 60, 80 and 100 mV/s) in 1.0 M KOH.

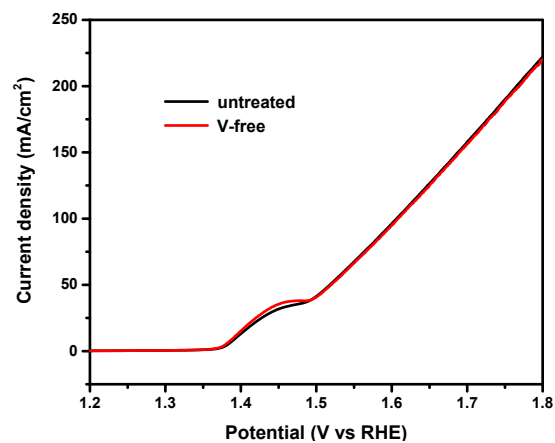

**Fig. S5** The OER activities of  $\text{Ni}_3\text{Fe}_{0.75}\text{V}_{0.25}/\text{Ni}_3\text{Fe}_{0.75}\text{V}_{0.25}\text{N}$  tested without iR correction in 1.0 M KOH solution with and without dissolved V ions.

To address the V-effect, the equal amount of fresh 1.0 M KOH solution was substituted after activating the samples, which was labeled as V-free. It can be seen from Fig. S5 that the activated  $\text{Ni}_3\text{Fe}_{0.75}\text{V}_{0.25}/\text{Ni}_3\text{Fe}_{0.75}\text{V}_{0.25}\text{N}$  shows indistinguishable LSV curves for OER, indicating that the trace amount of dissolved V ions barely affected the assessment of electrocatalytic activities.

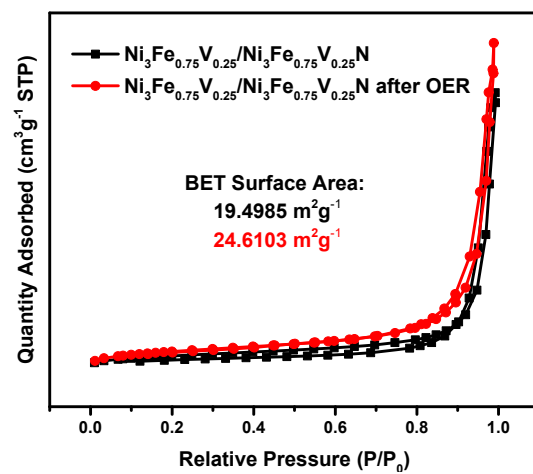

**Fig. S6** N<sub>2</sub> adsorption-desorption isotherms and Brunauer-Emmett-Teller (BET) specific surface areas of Ni<sub>3</sub>Fe<sub>0.75</sub>V<sub>0.25</sub>/Ni<sub>3</sub>Fe<sub>0.75</sub>V<sub>0.25</sub>N before and after OER.

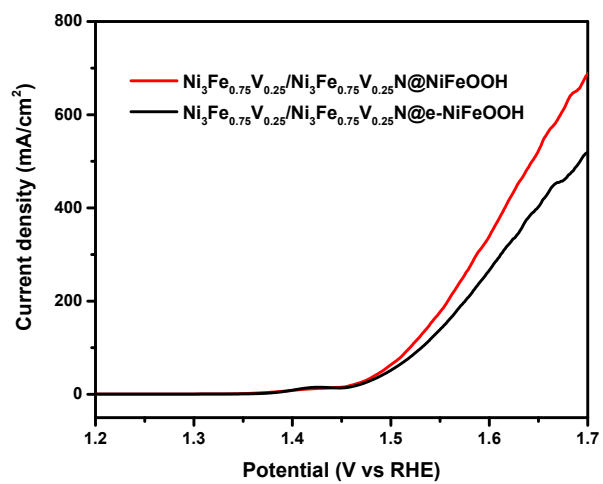

**Fig. S7** The OER polarization curves of Ni<sub>3</sub>Fe<sub>0.75</sub>V<sub>0.25</sub>/Ni<sub>3</sub>Fe<sub>0.75</sub>V<sub>0.25</sub>N with in-situ formed FeNi (oxy)hydroxide (Ni<sub>3</sub>Fe<sub>0.75</sub>V<sub>0.25</sub>/Ni<sub>3</sub>Fe<sub>0.75</sub>V<sub>0.25</sub>N@NiFeOOH) and electrodeposited FeNi (oxy)hydroxide (Ni<sub>3</sub>Fe<sub>0.75</sub>V<sub>0.25</sub>/Ni<sub>3</sub>Fe<sub>0.75</sub>V<sub>0.25</sub>N@e-NiFeOOH).



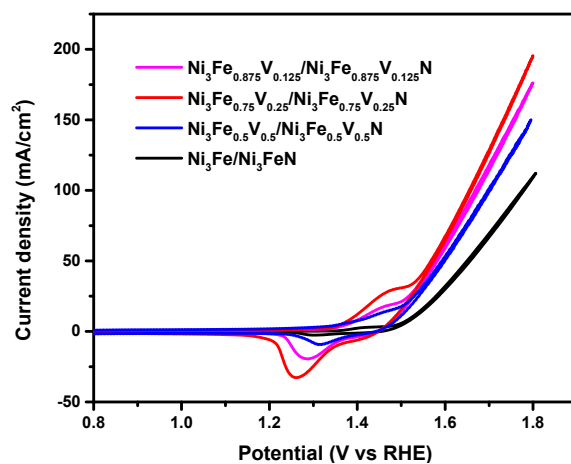

**Fig. S8** CV curves of  $\text{Ni}_3\text{Fe}_{1-x}\text{V}_x/\text{Ni}_3\text{Fe}_{1-x}\text{V}_x\text{N}$  ( $x = 0, 0.125, 0.25, 0.5$ ) in 1.0 M KOH with a scan rate of 100 mV/s without iR compensation.

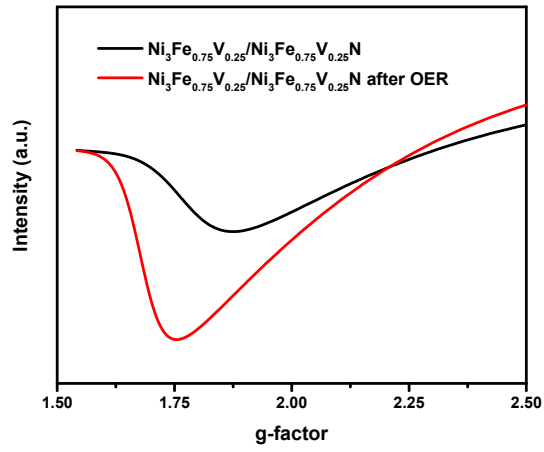

**Fig. S9** The EPR spectra of  $\text{Ni}_3\text{Fe}_{0.875}\text{V}_{0.125}/\text{Ni}_3\text{Fe}_{0.75}\text{V}_{0.25}\text{N}$  before and after OER.

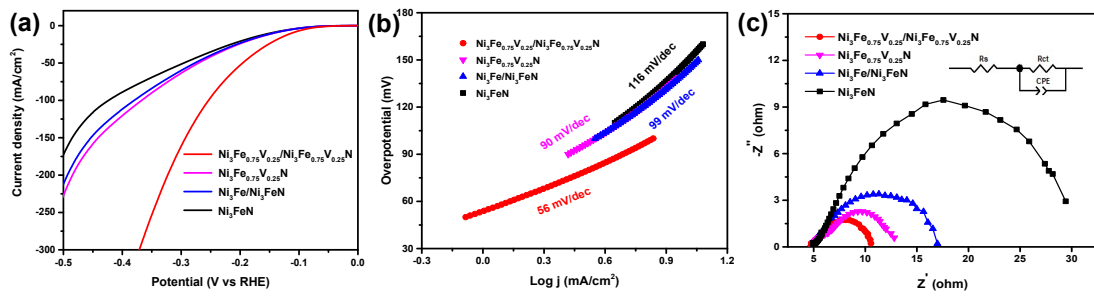

**Fig. S10** The performances and properties of  $\text{Ni}_3\text{FeN}$ ,  $\text{Ni}_3\text{Fe}_{0.75}\text{V}_{0.25}\text{N}$ ,  $\text{Ni}_3\text{Fe}/\text{Ni}_3\text{FeN}$ , and  $\text{Ni}_3\text{Fe}_{0.75}\text{V}_{0.25}/\text{Ni}_3\text{Fe}_{0.75}\text{V}_{0.25}\text{N}$  for HER. (a) HER polarization curves with 90% iR correction at a scan rate of 10 mV/s in 1.0 M KOH. (b) Tafel plots derived from the LSV data. (c) EIS Nyquist plots.

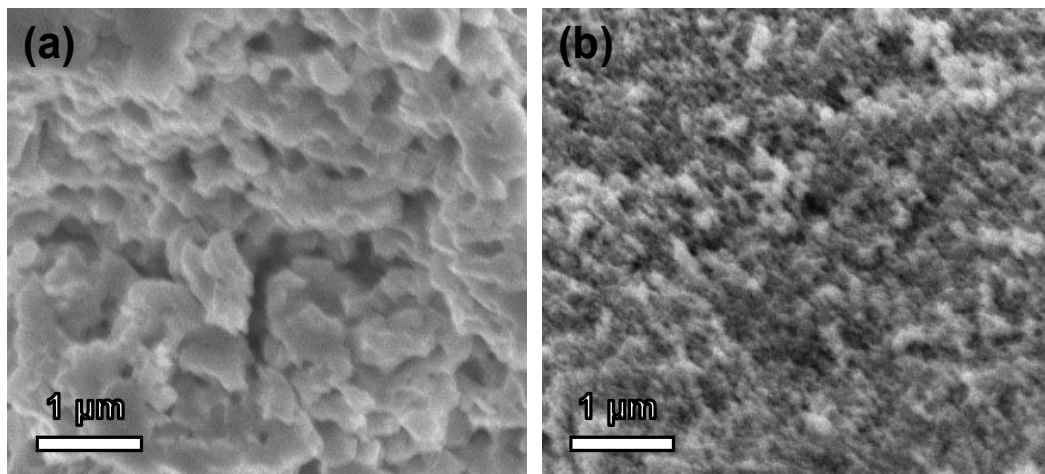

**Fig. S11** SEM images of (a) as-prepared  $\text{Ni}_3\text{Fe}/\text{Ni}_3\text{FeN}$  and (b)  $\text{Ni}_3\text{Fe}_{0.75}\text{V}_{0.25}/\text{Ni}_3\text{Fe}_{0.75}\text{V}_{0.25}\text{N}$ .

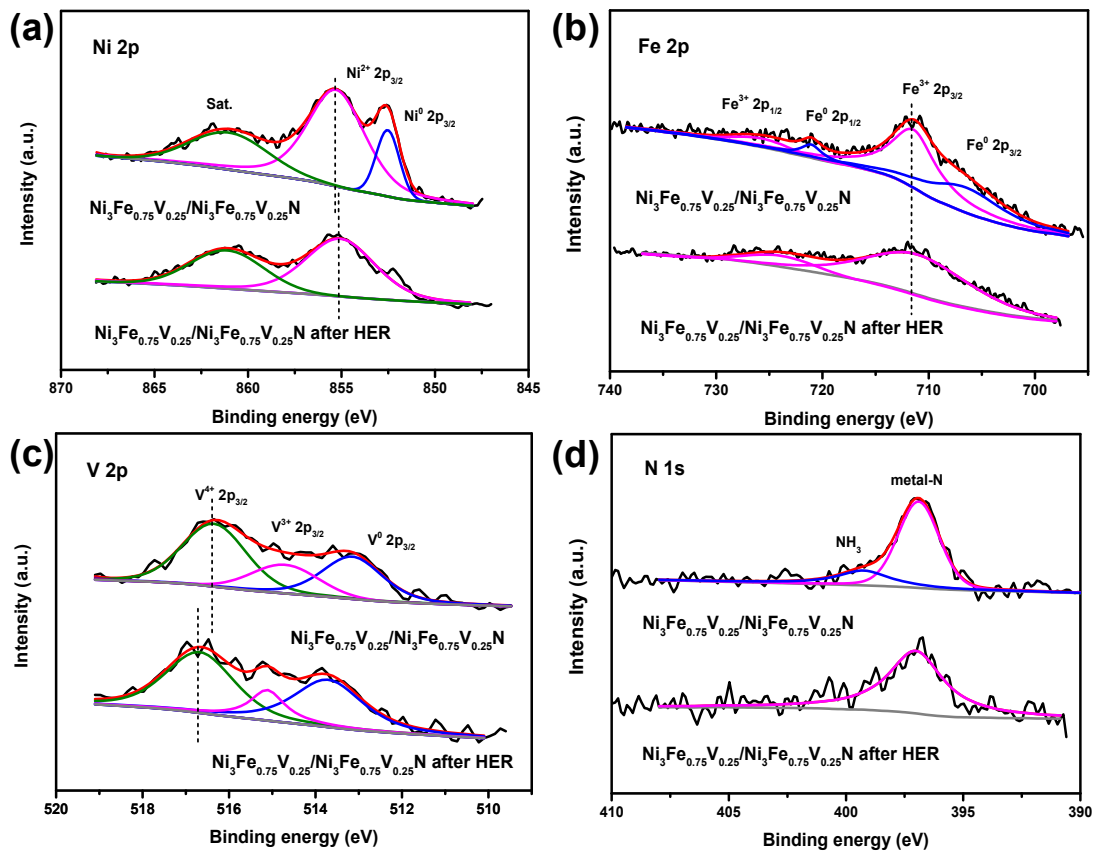

**Fig. S12** XPS spectra of (a) Ni 2p, (b) Fe 2p, (c) V 2p and (d) N 1s for  $\text{Ni}_3\text{Fe}_{0.75}\text{V}_{0.25}/\text{Ni}_3\text{Fe}_{0.75}\text{V}_{0.25}\text{N}$  before and after HER.

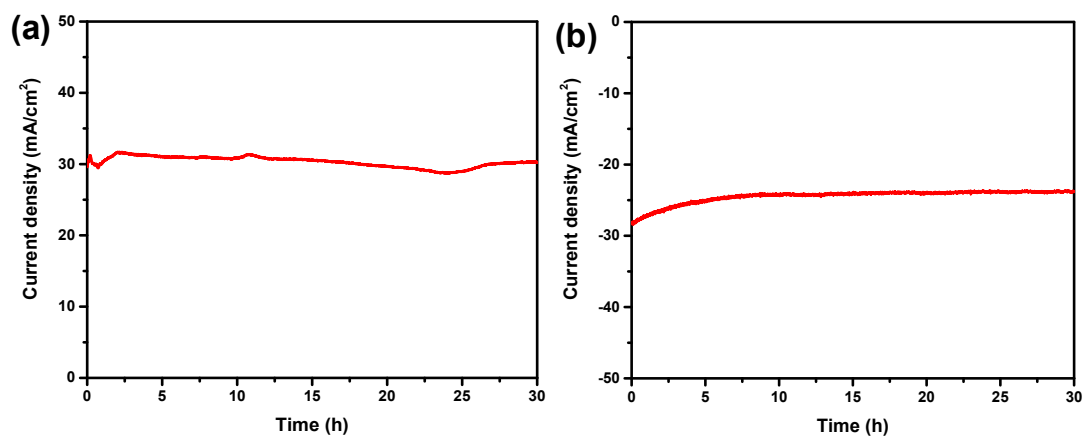

**Fig. S13** Time-dependent stability of  $\text{Ni}_3\text{Fe}_{0.75}\text{V}_{0.25}/\text{Ni}_3\text{Fe}_{0.75}\text{V}_{0.25}\text{N}$  for (a) OER and (b) HER at the applied potential of 1.5 V vs RHE and -0.3 V vs RHE, respectively.

**Table S1** Compositions of the samples determined by ICP-AES.

| Samples                                                                                                              | The content of metal ions<br>(mmol/L) |       |       | Mole ratio |      |
|----------------------------------------------------------------------------------------------------------------------|---------------------------------------|-------|-------|------------|------|
|                                                                                                                      | Ni                                    | Fe    | V     | Ni/(Fe+V)  | V/Fe |
| Ni <sub>3</sub> Fe/Ni <sub>3</sub> FeN                                                                               | 5.844                                 | 1.987 | /     | 2.94       | /    |
| Ni <sub>3</sub> Fe <sub>0.75</sub> V <sub>0.25</sub> /Ni <sub>3</sub> Fe <sub>0.75</sub> V <sub>0.25</sub> N         | 5.197                                 | 1.303 | 0.418 | 3.02       | 0.32 |
| Ni <sub>3</sub> Fe <sub>0.75</sub> V <sub>0.25</sub> /Ni <sub>3</sub> Fe <sub>0.75</sub> V <sub>0.25</sub> N@NiFeOOH | 4.481                                 | 1.067 | 0.129 | 3.75       | 0.12 |

**Table S2** The OER and HER performances comparison of V-Ni<sub>3</sub>Fe/Ni<sub>3</sub>FeN with the alloy(metal)/nitrides composite electrocatalysts currently reported.

| <b>Samples</b>                                                                                               | <b>OER (mV)</b>     | <b>HER (mV)</b>       | <b>Reference</b> |
|--------------------------------------------------------------------------------------------------------------|---------------------|-----------------------|------------------|
| Ni <sub>3</sub> Fe <sub>0.75</sub> V <sub>0.25</sub> /Ni <sub>3</sub> Fe <sub>0.75</sub> V <sub>0.25</sub> N | 261 ( $\eta_{50}$ ) | 113 ( $\eta_{10}$ )   | this work        |
| Ni <sub>3</sub> Fe/Ni <sub>3</sub> FeN                                                                       | 390 ( $\eta_{50}$ ) | 166 ( $\eta_{10}$ )   | 1                |
| Ni <sub>3</sub> Fe/Ni <sub>3</sub> FeN                                                                       | 290 ( $\eta_{50}$ ) | --                    | 2                |
| Ni <sub>3</sub> Fe/Ni <sub>3</sub> FeN                                                                       | 295 ( $\eta_{50}$ ) | 125 ( $\eta_{10}$ )   | 3                |
| Mo-Ni <sub>3</sub> Fe/Ni <sub>3</sub> FeN                                                                    | 340 ( $\eta_{50}$ ) | 234 ( $\eta_{10}$ )   | 4                |
| Fe <sub>3</sub> Pt/Ni <sub>3</sub> FeN                                                                       | 365 ( $\eta_{10}$ ) | --                    | 5                |
| Ni/Ni <sub>3</sub> FeN                                                                                       | 255 ( $\eta_{50}$ ) | --                    | 6                |
| NiCu/NiCuN/NC                                                                                                | 232 ( $\eta_{10}$ ) | 93 ( $\eta_{10}$ )    | 7                |
| FeCo/Co <sub>4</sub> N/NC                                                                                    | 280 ( $\eta_{10}$ ) | --                    | 8                |
| WC/W <sub>2</sub> N                                                                                          | 320 ( $\eta_{10}$ ) | 148.5 ( $\eta_{10}$ ) | 9                |
| Co <sub>3</sub> W/WN                                                                                         | 273 ( $\eta_{10}$ ) | 43 ( $\eta_{10}$ )    | 10               |
| CoB <sub>x</sub> @BN                                                                                         | 290 ( $\eta_{10}$ ) | --                    | 11               |

It was noted that the overpotential of Ni/Ni<sub>3</sub>FeN@NiFeOOH reported in the reference 6 was a little smaller than the Ni<sub>3</sub>Fe<sub>0.75</sub>V<sub>0.25</sub>/Ni<sub>3</sub>Fe<sub>0.75</sub>V<sub>0.25</sub>N@NiFeOOH sample in this work, however, our catalysts presented much higher current density than Ni/Ni<sub>3</sub>FeN@NiFeOOH at high potential.



**Table S3** Fitting parameters of EIS plots for OER based on the Randle's equivalent circuit.

| Samples                                                                                                          | CPE/QPE |                  | C <sub>ct</sub> (mF) | R <sub>ct</sub> (Ω) | R <sub>s</sub> (Ω) |
|------------------------------------------------------------------------------------------------------------------|---------|------------------|----------------------|---------------------|--------------------|
|                                                                                                                  | P=n     | T=Q <sup>n</sup> |                      |                     |                    |
| Ni <sub>3</sub> FeN                                                                                              | 0.86    | 1.6161           | 0.228                | 122.9               | 6.941              |
| Ni <sub>3</sub> Fe/Ni <sub>3</sub> FeN                                                                           | 0.89    | 3.4247           | 0.956                | 30.35               | 6.953              |
| Ni <sub>3</sub> Fe <sub>0.75</sub> V <sub>0.25</sub> N                                                           | 0.89    | 9.2408           | 3.297                | 16.49               | 7.167              |
| Ni <sub>3</sub> Fe <sub>0.875</sub> V <sub>0.125</sub> /Ni <sub>3</sub> Fe <sub>0.875</sub> V <sub>0.125</sub> N | 0.75    | 21.946           | 1.862                | 14.57               | 6.568              |
| Ni <sub>3</sub> Fe <sub>0.75</sub> V <sub>0.25</sub> /Ni <sub>3</sub> Fe <sub>0.75</sub> V <sub>0.25</sub> N     | 0.76    | 67.172           | 13.01                | 5.972               | 5.532              |
| Ni <sub>3</sub> Fe <sub>0.5</sub> V <sub>0.5</sub> /Ni <sub>3</sub> Fe <sub>0.5</sub> V <sub>0.5</sub> N         | 0.86    | 12.026           | 3.141                | 10.96               | 5.635              |

**Table S4** Fitting parameters of EIS plots for HER based on the Randle's equivalent circuit.

| Samples                                                                                                      | CPE/QPE |                  | C <sub>ct</sub> (mF) | R <sub>ct</sub> (Ω) | R <sub>s</sub> (Ω) |
|--------------------------------------------------------------------------------------------------------------|---------|------------------|----------------------|---------------------|--------------------|
|                                                                                                              | P=n     | T=Q <sup>n</sup> |                      |                     |                    |
| Ni <sub>3</sub> FeN                                                                                          | 0.76    | 8.4979           | 0.420                | 26.24               | 5.531              |
| Ni <sub>3</sub> Fe/Ni <sub>3</sub> FeN                                                                       | 0.63    | 14.344           | 0.048                | 12.78               | 5.056              |
| Ni <sub>3</sub> Fe <sub>0.75</sub> V <sub>0.25</sub> N                                                       | 0.66    | 10.761           | 0.056                | 7.595               | 5.685              |
| Ni <sub>3</sub> Fe <sub>0.75</sub> V <sub>0.25</sub> /Ni <sub>3</sub> Fe <sub>0.75</sub> V <sub>0.25</sub> N | 0.67    | 18.577           | 0.228                | 5.821               | 5.115              |

The effective capacitance associated with the CPE can be calculated based on the equation:

$$C_{ct} = Q^{1/n} (1/R_s + 1/R_{ct})^{(n-1)/n}$$

where the parameters of pre-factor (Q) and exponent (n) are independent of frequency. When n=1,

Q represents the capacity of the interface; when n<1, the system behavior is related to the surface

heterogeneity <sup>12</sup>.

1. H. Li, S. Ci, M. Zhang, J. Chen, K. Lai and Z. Wen, *ChemSusChem*, 2017, **10**, 4756-4763.
2. X. Fu, J. Zhu, B. Ao, X. Lyu and J. Chen, *Inorg. Chem. Commun.*, 2020, **113**, 107802.
3. Z. Li, H. Jang, D. Qin, X. Jiang, X. Ji, M. G. Kim, L. Zhang, X. Liu and J. Cho, *J. Mater. Chem. A*, 2021, **9**, 4036-4043.
4. Z. Shao, J. Sun, Z. Yan, K. Huang, F. Tian, H. Xue and Q. Wang, *Appl. Surf. Sci.*, 2020, **529**, 147172.
5. Z. Cui, G. Fu, Y. Li and J. B. Goodenough, *Angew. Chem. Int. Ed. Engl.*, 2017, **56**, 9901-9905.
6. J. Wang, F. Cao, C. Shen, G. Li, X. Li, X. Yang, S. Li and G. Qin, *Catal. Sci. Technol.*, 2020, **10**, 4458-4466.
7. J. Hou, Y. Sun, Z. Li, B. Zhang, S. Cao, Y. Wu, Z. Gao and L. Sun, *Adv. Funct. Mater.*, 2018, **28**, 1803278.
8. X. Zhu, T. Jin, C. Tian, C. Lu, X. Liu, M. Zeng, X. Zhuang, S. Yang, L. He, H. Liu and S. Dai, *Adv. Mater.*, 2017, **29**, 1704091.
9. J. Diao, Y. Qiu, S. Liu, W. Wang, K. Chen, H. Li, W. Yuan, Y. Qu and X. Guo, *Adv. Mater.*, 2020, **32**, 1905679.
10. J. Zheng, J. Chen, L. Xiao, X. Cheng and H. Cui, *ChemElectroChem*, 2020, **7**, 4971-4978.
11. S. Chen, Y. Li, Z. Zhang, Q. Fu and X. Bao, *J. Mater. Chem. A*, 2018, **6**, 10644-10648.
12. B. Hirschorn, M. E. Orazem, B. Tribollet, V. Vivier, I. Frateur and M. Musiani, *Electrochim. Acta*, 2010, **55**, 6218-6227.

## References
